# Supplementary material for: Intramolecular oxidative cyclization of alkenes by rhodium/cobalt porphyrins in water
Source: Royal Society of Chemistry journal article supplement (doi:10.1039/c4qi00066h), 2014-01-01

*Electronic Supplementary Information*

## **Intramolecular oxidative cyclization of alkenes by rhodium/cobalt porphyrins in water**

**Lin Yun, Zikuan Wang, Xuefeng Fu\***

*Beijing National Laboratory for Molecular Sciences, State Key Lab of Rare Earth Materials Chemistry and Applications, College of Chemistry and Molecular Engineering, Peking University, Beijing, 100871, China.*

### **Table of Contents**

|                                                                                    |     |
|------------------------------------------------------------------------------------|-----|
| Experimental                                                                       | P2  |
| Table 1. Formation of heterocyclic unsaturated products                            | P3  |
| Synthesis of starting materials                                                    | P4  |
| Characterization of $\beta$ -hetero-functionalized alkyl rhodium/cobalt porphyrins | P6  |
| Characterization of cyclization product                                            | P9  |
| Explanation of alkyl cobalt porphyrins                                             | P10 |
| References                                                                         | P11 |
| Representative $^1\text{H}$ NMR spectra of alkyl rhodium/cobalt porphyrins         | P12 |

## EXPERIMENTAL

### General

D<sub>2</sub>O, CD<sub>3</sub>OD, CDCl<sub>3</sub> were purchased from Cambridge Isotope Laboratory Inc.; tetra p-sulfonatophenyl porphyrin from Tokyo Chemical Industry (TCI); (Rh(CO)<sub>2</sub>Cl)<sub>2</sub> from Stream Chemical Inc.; and all other chemicals were purchased from Aldrich or Alfa Aesar unless otherwise noted and used as received. Mass spectra were taken on a Bruker Apex IV FTMS. Room temperature <sup>1</sup>H NMR spectra were recorded on a Bruker AV-400 spectrometer. The chemical shifts were referenced to 3-trimethylsilyl-1-propanesulfonic acid sodium salt (DSS). GC-MS results were obtained by the Agilent 7980A/5975C GC/MSD system equipped with the DB-17MS (30 m, 0.25 mm, 0.25 μm) column. All reagents and solvents were of commercial quality and distilled or dried when necessary using standard procedures.

**Preparation of Na<sub>3</sub>[(TSPP)M<sup>III</sup>(H<sub>2</sub>O)<sub>2</sub>] (M = Rh, and Co):** Na<sub>3</sub>[(TSPP)M<sup>III</sup>(H<sub>2</sub>O)<sub>2</sub>] was synthesized by literature methods of Ashley<sup>[1]</sup>. The equilibrium distribution of [(TSPP)Rh<sup>III</sup>(D<sub>2</sub>O)<sub>2</sub>]<sup>-3</sup>, [(TSPP)Rh<sup>III</sup>(D<sub>2</sub>O)(OD)]<sup>-4</sup> and [(TSPP)Rh<sup>III</sup>(OD)<sub>2</sub>]<sup>-5</sup> were reported in the previously published paper.<sup>[2]</sup> Na<sub>3</sub>[(TSPP)Rh<sup>III</sup>(H<sub>2</sub>O)<sub>2</sub>]: <sup>1</sup>HNMR (D<sub>2</sub>O, 400 MHz) δ (ppm): 9.15 (s, 8H, pyrrole), 8.44 (d, 8H, o-phenyl, J<sub>H-H</sub> = 8 Hz), 8.25 (d, m-phenyl, J<sub>H-H</sub> = 8 Hz). Na<sub>3</sub>[(TSPP)Co<sup>III</sup>(H<sub>2</sub>O)<sub>2</sub>]: <sup>1</sup>HNMR (D<sub>2</sub>O, 400 MHz) δ (ppm): 9.37 (s, 8H, pyrrole), 8.41 (d, 8H, o-phenyl, J<sub>H-H</sub> = 8 Hz), 8.22 (d, m-phenyl, J<sub>H-H</sub> = 8 Hz).

**Typical procedure for preparation of β-hetero-functionalized alkyl rhodium porphyrins:** Na<sub>3</sub>[(TSPP)Rh<sup>III</sup>(H<sub>2</sub>O)<sub>2</sub>] (1.1 mg, 0.001 mmol) and alkenes (10 equiv) were dissolved in 0.3 mL borate buffer D<sub>2</sub>O solution (pH = 8.0) in vacuum adapted NMR tubes at room temperature, respectively. The progress of the reaction was monitored by <sup>1</sup>H NMR. After completion, the mixture was transferred to a 10 mL round-bottomed flask and the solvent was removed using the Schlenk line. The resulting solid was washed by ethyl ether and CHCl<sub>3</sub> to removed excess substrate.

**Typical procedure for preparation of β-hetero-functionalized alkyl cobalt porphyrins:** Na<sub>3</sub>[(TSPP)Co<sup>III</sup>(H<sub>2</sub>O)<sub>2</sub>] (1.1 mg, 0.001 mmol) and alkenes (10 equiv) were dissolved in 0.3 mL borate

buffer D<sub>2</sub>O solution (pH = 9.0) in vacuum adapted NMR tubes at room temperature, respectively. The progress of the reaction was monitored by <sup>1</sup>H NMR. After completion, the mixture was transformed to a 10 mL round-bottomed flask wrapped with aluminum foil and the solvent was removed using the Schlenk line. The resulting solid was direct sent to <sup>1</sup>H NMR study.

**Typical procedure for production of 2-methylbenzofurans:** purified β-phenoxyalkyl rhodium/cobalt porphyrin complexes were dissolved in 0.3 mL D<sub>2</sub>O in vacuum adapted NMR tubes. After three freeze–thaw cycles, the solution was charged with N<sub>2</sub> in the glove box, heated at 333K. The elimination process was followed by <sup>1</sup>H NMR. After complete conversion of the rhodium alkyl complexes, 0.3 mL CDCl<sub>3</sub> was added to extract the formed product. GC-MS was also used to identify the 2-methylbenzofurans.

**Table S1** Formation of heterocyclic unsaturated products<sup>a</sup>

| Entry | Substrate | Product | Time(min)        | Conv.(%) <sup>b</sup> |
|-------|-----------|---------|------------------|-----------------------|
| 1     |           |         | 1: 30<br>14: <60 | > 95                  |
| 2     |           |         | 1: 45<br>14: <60 | > 95                  |
| 3     |           |         | 1: 20<br>14: <60 | > 95                  |
| 4     |           |         | 1: 15<br>14: <60 | > 95                  |
| 5     |           |         | 30               | > 95                  |

<sup>a</sup> 333K, D<sub>2</sub>O (400 mL, pH 8.0 borate buffer), N<sub>2</sub> (1 atm) protection.

<sup>b</sup> Conversion of alkyl rhodium porphyrin intermediate was determined by <sup>1</sup>H NMR. The conversion was almost quantitative. However, the yield was not determined due to small amount of product.

## Synthesis

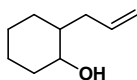

**2-Allylcyclohexanol.**<sup>[3]</sup> A 3-neck 100 mL round-bottom flask fitted with a mechanical stirrer, 25 mL addition funnel was charged with allyl magnesium bromide (1.0 M in Et<sub>2</sub>O, 20 mL, 20 mmol, 3 equiv) and 16 mL Et<sub>2</sub>O. Cyclohexene oxide (0.67 mL, 6.6 mmol, 1.0 equiv) was added dropwise. 30 min after addition, the mixture was refluxed for 3 hours which was then quenched by saturated NH<sub>4</sub>Cl solution (30 mL) was carefully added. The solution was transferred to a separatory funnel and the organic layer was collected. The aqueous layer was extracted by Et<sub>2</sub>O (30 mL × 3). The organic layers were combined, dried over Na<sub>2</sub>SO<sub>4</sub>, filtered and concentrated. The residue was purified by flash column chromatography to give a pale yellow oil (42% yeild). The spectral data match that of the literature compound.

<sup>1</sup>H NMR (400 MHz, CDCl<sub>3</sub>) δ 5.85 (ddt, 1H), 5.08 (m, 1H), 5.03 (m, 1H), 3.26 (m, 1H), 2.45 (m, 1H), 2.01-1.94 (m, 2H), 1.79 (m, 2H), 1.63 (m, 2H), 1.38-1.18 (m, 4H), 0.95 (m, 1H); <sup>13</sup>C NMR (400 MHz, CDCl<sub>3</sub>) δ 137.60, 116.08, 74.71, 45.03, 35.70, 30.49, 29.80, 25.63, 25.02.

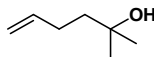

**2-Methylhex-5-en-2-ol.**<sup>[3]</sup> A 3-neck 50mL round-bottom flask fitted with a mechanical stirrer, 25 mL addition funnel was charged with methyl magnesium bromide (3.0 M in Et<sub>2</sub>O, 7.0 mL, 21 mmol, 1.2 equiv) and 10 mL Et<sub>2</sub>O. 5-hexen-2-one (2.0 mL, 17 mmol, 1.0 equiv) was added dropwise. One hour after addition was complete, saturated NH<sub>4</sub>Cl solution (6 mL) was carefully added. The solution was transferred to a separatory funnel and the organic layer was collected. The aqueous layer was extracted by Et<sub>2</sub>O (15 mL × 3). The organic layers were combined, dried over Na<sub>2</sub>SO<sub>4</sub>, filtered and concentrated to give a pale yellow oil as the pure product (56% yeild). The spectral data match that of the literature compound. <sup>1</sup>H NMR (400 MHz, CDCl<sub>3</sub>) δ 5.75 (ddt, 1H), 4.94 (ddd, 1H), 4.85 (ddd, 1H), 2.05 (m, 2H), 1.48 (m, 1H), 1.13 (s, 6H); <sup>13</sup>C NMR (400 MHz, CDCl<sub>3</sub>) δ 139.98, 114.13, 70.68, 42.76, 29.06, 28.70.

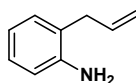

**2-Allylaniline.**<sup>[4]</sup> In a 100-mL seal-tube, a cold solution (at  $-78\text{ }^{\circ}\text{C}$ ) of N-allylaniline (1.33 g, 10.0 mmol) in m-xylene (20 mL) was added boron trifluoride etherate (1.5 mL, 12.0 mmol) under an argon atmosphere. After 5 min, the solution was warmed to room temperature and then heated to  $180\text{ }^{\circ}\text{C}$ . After 17 h, the reaction was cooled down to room temperature and quenched with 2 M NaOH solution (20 mL) at  $0\text{ }^{\circ}\text{C}$ . The organic layer was separated and the aqueous layer was extracted with diethyl ether (15 mL  $\times$  3). The combined organic layers were filtered and concentrated in vacuo. The residue was purified by flash column chromatography to give the product as a yellow oil (30% yield).

$^1\text{H}$  NMR (400 MHz,  $\text{CDCl}_3$ )  $\delta$  7.06-7.03 (m, 2H), 6.74 (t, 1H), 6.67 (d, 1H), 6.01-5.88 (m, 1H), 5.13-5.06 (m, 2H), 3.64 (bs, 2H), 3.30 (d, 2H);  $^{13}\text{C}$  NMR (400 MHz,  $\text{CDCl}_3$ )  $\delta$  144.92, 136.08, 130.29, 127.66, 124.15, 119.01, 116.21, 115.95, 36.60.

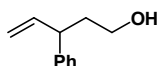

**3-Phenylpent-4-en-1-ol.**<sup>[5]</sup> A mixture of cynamyl alcohol (18.7 mmol, 2.5 g), triethyl orthoacetate (107.4 mmol, 14 mL) and catalytic amount of propionic acid was heated at  $150\text{ }^{\circ}\text{C}$  overnight. The resulting mixture was concentrated and purified through silica gel column chromatography. The ester was then dissolved in THF (20 mL) and treated slowly with lithium aluminum hydride (12.5 mmol, 0.5 g) at  $0\text{ }^{\circ}\text{C}$ . The mixture was then warmed to room temperature and stirred for 4 hours. The resulting mixture was poured into 1 M NaOH (aq, 50 mL) and ice with vigorous stirring to give white suspension. After filtration, the resulting solution was extracted with  $\text{Et}_2\text{O}$  (50 mL  $\times$  3). The combined organic layers were washed with 1 M HCl (aq, 30 mL  $\times$  2), brine (30 mL) and dried over  $\text{Na}_2\text{SO}_4$ . After filtration and concentration in vacuo, the residue was purified through silica gel column chromatography to give the final product (47% yield).  $^1\text{H}$  NMR (400 MHz,  $\text{CDCl}_3$ )  $\delta$  7.30-7.17 (m, 5H), 5.93 (m, 1H), 5.06 (m, 2H), 3.61 (m, 2H), 3.45 (q, 1H), 1.98 (m, 2H);  $^{13}\text{C}$  NMR (400 MHz,  $\text{CDCl}_3$ )  $\delta$  143.78, 141.89, 128.64, 127.66, 126.45, 114.45, 60.88, 46.30, 37.99, 36.60.

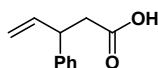

**3-Phenyl-4-pentenoic acid.**<sup>[5]</sup> The complex was prepared according to literature procedures [2].  $^1\text{H}$  NMR (400 MHz,  $\text{CDCl}_3$ )  $\delta$  10.7 (br s, 1H), 7.29-7.11 (m, 5H), 5.85-6.02 (m, 1H), 5.02-4.98 (m, 2H),

4.95 (ddt, 1H), 4.03 (q, 1H), 2.68 (m, 2H);  $^{13}\text{C}$  NMR (400 MHz,  $\text{CDCl}_3$ )  $\delta$  178.06, 142.27, 140.08, 128.74, 127.62, 126.89, 115.11, 45.28, 40.05.

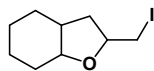

**2-(iodomethyl)octahydrobenzofuran.**<sup>[6]</sup> 2-allylphenol (1.0 mmol) and iodine (1.2 mmol) was added in ethanol/water (20 mL, 1/9). The mixture was stirred at 50 °C for 12 h. After completion, the reaction mixture was extracted with  $\text{Et}_2\text{O}$  and washed with water. The combined organic fraction was washed with aqueous sodium thiosulphate, dried over  $\text{Na}_2\text{SO}_4$  and evaporated to generate the crude product, which was chromatographed to afford the product as yellow powder (81% yield).

### Formation of $\beta$ -hetero-functionalized alkyl rhodium porphyrins

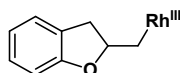

**Reaction of (TSPP)Rh<sup>III</sup> with 2-allylphenol.**  $^1\text{H}$  NMR (400 MHz,  $\text{D}_2\text{O}$ )  $\delta$  8.56 (8H, pyrrole), 8.20-7.97 (16H, phenyl), 6.16-5.87 (m, 3H), 5.24 (m, 1H), -0.65 (d, 2H), -1.75 (d, 1H), -2.40 (m, 1H), -5.67 (m, 1H), -5.81 (m, 1H). MS (ESI):  $m/z$ : 290.99903, *calcd.* 291.99900.

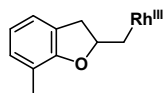

**Reaction of (TSPP)Rh<sup>III</sup> with 2-allyl-6-methylphenol.**  $^1\text{H}$  NMR (400 MHz,  $\text{CD}_3\text{OD}$ )  $\delta$  8.70 (8H, pyrrole), 8.12-8.01 (16H, phenyl), 6.17-6.03 (m, 3H), 5.24 (m, 1H), 1.09 (s, 3H), -0.52 (d, 2H), -1.49 (d, 1H), -2.51 (m, 1H), -5.57 (m, 1H), -5.74 (m, 1H). MS (ESI):  $m/z$ : 400.33510, *calcd.* 400.33399.

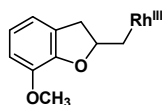

**Reaction of (TSPP)Rh<sup>III</sup> with 2-allyl-6-methoxyphenol.**  $^1\text{H}$  NMR (400 MHz,  $\text{CD}_3\text{OD}$ )  $\delta$  8.70 (8H, pyrrole), 8.12-8.01 (16H, phenyl), 8.68 (m, 2H), 5.85 (m, 1H), 3.03 (s, 3H), -0.49 (d, 2H), -1.50 (d, 1H), -2.51 (m, 1H), -5.63 (m, 1H), -5.76 (m, 1H). MS (ESI):  $m/z$ : 405.66726, *calcd.* 405.66563.

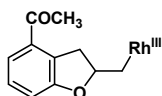

**Reaction of (TSPP)Rh<sup>III</sup> with 1-(2-allyl-3-hydroxyphenyl)ethanone.** <sup>1</sup>H NMR (400 MHz, CD<sub>3</sub>OD) δ 8.75 (8H, pyrrole), 8.26-8.24 (16H, phenyl), 7.15 (dd, 1H), 5.56 (d, 1H), 2.21 (s, 3H), -0.24 (q, 1H), -1.40 (m, 1H), -2.10 (dd, 1H), -5.52 (m, 1H), -5.71 (m, 1H). MS (ESI): *m/z*: 409.66760, *calcd.* 409.66563.

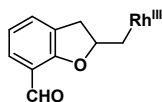

**Reaction of (TSPP)Rh<sup>III</sup> with 3-allyl-2-hydroxybenzaldehyde.** <sup>1</sup>H NMR (400 MHz, CD<sub>3</sub>OD) δ 8.68 (8H, pyrrole), 8.11-7.79 (16H, phenyl), 6.73 (d, 2H), 6.55 (d, 1H), 6.26 (t, 3H), 3.03 (s, 3H), -0.46 (dd, 2H), -1.31 (m, 1H), -2.51 (m, 1H), -5.55 (m, 1H), -5.77 (m, 1H). MS (ESI): *m/z*: 406.33963, *calcd.* 406.33751.

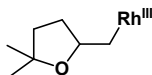

**Reaction of (TSPP)Rh<sup>III</sup> with 2-methylhex-5-en-2-ol.** <sup>1</sup>H NMR (400 MHz, D<sub>2</sub>O) δ 8.62 (8H, pyrrole), 8.39-8.12 (16H, phenyl), 0.15 (m, 1H), -0.03 (s, 3H), -0.13 (m, 1H), -0.18 (s, 3H), -1.91 (m, 1H), -2.62 (m, 1H), -3.23 (m, 1H), -5.82 (m, 1H), -5.91 (m, 1H). MS (ESI): *m/z*: 286.00632, *calcd.* 286.00682.

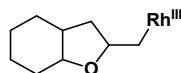

**Reaction of (TSPP)Rh<sup>III</sup> with 2-allylcyclohexanol.** <sup>1</sup>H NMR (400 MHz, D<sub>2</sub>O) δ 8.62 (8H, pyrrole), 8.39-8.12 (16H, phenyl), 0.39 (m, 1H), -0.09 (m, 1H), -1.03 (m, 1H), -1.96 (m, 1H), -2.35 (m, 1H), -3.65 (m, 1H), -5.68 (m, 1H), -5.83 (m, 1H).

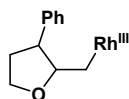

**Reaction of (TSPP)Rh<sup>III</sup> with 3-phenylpent-4-en-1-ol.** <sup>1</sup>H NMR (400 MHz, D<sub>2</sub>O) δ 8.36 (8H, pyrrole), 8.17-8.05 (16H, phenyl), 6.83 (m, 1H), 6.67 (m, 2H), 5.17 (m, 2H), -0.39 (m, 3H), -0.24 (m, 1H), -0.91 (m, 1H), -3.44 (m, 1H), -6.02 (m, 1H), -6.12 (m, 1H). MS (ESI): *m/z*: 298.00632, *calcd.* 298.00682.

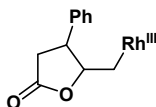

**Reaction of (TSPP)Rh<sup>III</sup> with 3-phenylpent-4-enoic acid.** <sup>1</sup>H NMR (400 MHz, D<sub>2</sub>O) δ 8.60 (8H, pyrrole), 8.31-8.00 (16H, phenyl), 6.86 (1H), 6.68 (2H), 5.05 (2H), 1.04 (1H), -0.58 (1H), -2.39 (1H), -5.82 (1H), -5.98 (1H). MS (ESI): *m/z*: 301.50235, *calcd.* 301.50164.

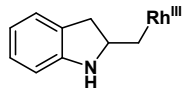

**Reaction of (TSPP)Rh<sup>III</sup> with 2-allylaniline.** <sup>1</sup>H NMR (400 MHz, D<sub>2</sub>O) δ 8.53 (8H, pyrrole), 8.17-8.04 (16H, phenyl), 6.74 (m, 1H), 6.63 (m, 2H), 5.45 (m, 2H), 0.07 (m, 1H), -1.36 (m, 1H), -2.64 (m, 1H), -5.87 (m, 1H), -5.89 (m, 1H).

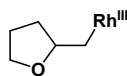

**Reaction of (TSPP)Rh<sup>III</sup> with pent-4-en-1-ol in methanol.** <sup>1</sup>H NMR (400 MHz, CD<sub>3</sub>OD) δ 8.78 (8H, pyrrole), 8.39-8.12 (16H, phenyl), 2.02 (m, 2H), 0.37 (m, 1H), 0.15 (m, 1H), -1.71 (m, 1H), -1.74 (m, 1H), -2.29 (m, 1H), -3.25 (dd, 1H), -5.58 (m, 1H), -5.81 (m, 1H).

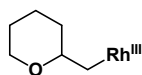

**Reaction of (TSPP)Rh<sup>III</sup> with hex-5-en-1-ol in methanol.** <sup>1</sup>H NMR (400 MHz, CD<sub>3</sub>OD) δ 8.67 (8H, pyrrole), 8.26-8.18 (16H, phenyl), 1.46 (m, 2H), 0.47 (m, 1H), 0.11 (m, 1H), -0.19 (m, 1H), -1.89 (m, 1H), -2.48 (m, 1H), -3.37 (m, 1H), -5.63 (m, 1H), -5.86 (m, 1H).

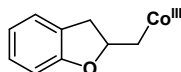

**Reaction of (TSPP)Co<sup>III</sup> with 2-allylphenol.** <sup>1</sup>H NMR (400 MHz, CD<sub>3</sub>OD) δ 8.23 (8H, pyrrole), 7.82-7.65 (16H, phenyl), 6.33-6.16 (m, 3H), 5.48 (m, 1H), -1.12 (m, 1H), -2.48 (m, 1H), -2.82 (m, 1H), -5.00 (m, 1H), -5.17 (m, 1H).

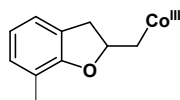

**Reaction of (TSPP)Co<sup>III</sup> with 2-allyl-6-methylphenol.** <sup>1</sup>H NMR (400 MHz, D<sub>2</sub>O) δ 8.83 (8H, pyrrole), 8.23-7.85 (16H, phenyl), 6.63 (br, 1H), 5.95 (br, 1H), 5.33 (br, 1H), -0.42 (m, 1H), -1.42 (m, 1H), -2.19 (m, 1H), -4.01 (m, 1H), -4.46 (m, 1H).



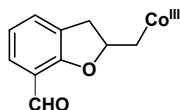

**Reaction of (TSPP)Rh<sup>III</sup> with 3-allyl-2-hydroxybenzaldehyde.** <sup>1</sup>H NMR (400 MHz, D<sub>2</sub>O) δ 8.84 (8H, pyrrole), 8.21-7.85 (16H, phenyl), 6.62 (br, 1H), 5.92 (br, 1H), 5.41 (br, 1H), -0.34 (m, 1H), -1.23 (m, 1H), -2.16 (m, 1H), -4.03 (m, 1H), -4.53 (m, 1H).

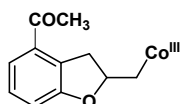

**Reaction of (TSPP)Rh<sup>III</sup> with 1-(2-allyl-3-hydroxyphenyl)ethanone.** <sup>1</sup>H NMR (400 MHz, D<sub>2</sub>O) δ 8.83 (8H, pyrrole), 8.23-7.73 (16H, phenyl), 6.63 (br, 2H), 5.83 (br, 1H), -0.24 (m, 1H), 2.09 (s, 3H), -1.39 (m, 1H), -1.94 (m, 1H), -4.13 (m, 1H), -4.49 (m, 1H).

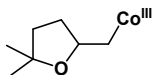

**Reaction of (TSPP)Co<sup>III</sup> with 2-methylhex-5-en-2-ol.** <sup>1</sup>H NMR (400 MHz, D<sub>2</sub>O) δ 8.62 (8H, pyrrole), 7.82-7.65 (16H, phenyl), 0.03 (m, 1H), -0.11 (s, 3H), -0.21 (m, 1H), -0.28 (s, 3H), -2.21 (m, 1H), -2.87 (m, 1H), -3.42 (m, 1H), -4.66 (m, 1H), -5.01 (m, 1H).

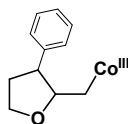

**Reaction of (TSPP)Rh<sup>III</sup> with 3-Phenyl-4-pentenoic acid.** <sup>1</sup>H NMR (400 MHz, D<sub>2</sub>O) δ 8.16 (b, 8H, pyrrole), 8.05 (b, 16H, phenyl), 6.73 (t, 1H), 6.47 (t, 2H), 2.17 (1H), 0.86 (2H), 0.63 (1H), -0.64 (1H), -3.39 (1H), -4.87 (1H), -5.28 (1H).

### β-H elimination product of Table 1

All BHE products of rhodium/cobalt alkyl complexes were carefully characterized by GC-MS.

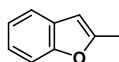

**2-methylbenzofuran**<sup>[7]</sup> <sup>1</sup>H NMR (400 MHz, CDCl<sub>3</sub>) δ 7.44 (d, 1H), 7.35 (d, 1H), 7.15 (m, 2H), 6.42 (1H), 2.42 (m, 3H).

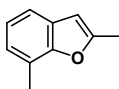

**2,7-dimethylbenzofuran**<sup>[8]</sup> <sup>1</sup>H NMR (400 MHz, CDCl<sub>3</sub>) δ 7.27 (d, 1H), 7.04 (t, 1H), 6.98 (d, 1H), 6.41 (s, 1H), 6.42 (1H), 2.42 (m, 6H).

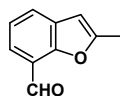

**2-methylbenzofuran-7-carbaldehyde** <sup>1</sup>H NMR (400 MHz, CDCl<sub>3</sub>) δ 7.39 (d, 1H), 7.24 (d, 1H), 7.16 (t, 1H), 6.46 (s, 1H), 2.46 (m, 3H).

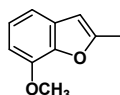

**7-methoxy-2-methylbenzofuran**<sup>[8]</sup> <sup>1</sup>H NMR (400 MHz, CDCl<sub>3</sub>) δ 7.10 (d, 1H), 7.02 (t, 1H), 6.69 (d, 1H), 6.19 (s, 1H), 3.71 (s, 3H), 2.29 (s, 3H).

### Explanation of cobalt alkyl complexes

**Elimination** Charged with air or oxygen, (TSPP)Co<sup>III</sup> mediated oxidative cyclization of 2-allylphenol derivatives gave cyclization product and mixture of (TSPP)Co<sup>II</sup> and (TSPP)Co<sup>III</sup> (Fig S1) :

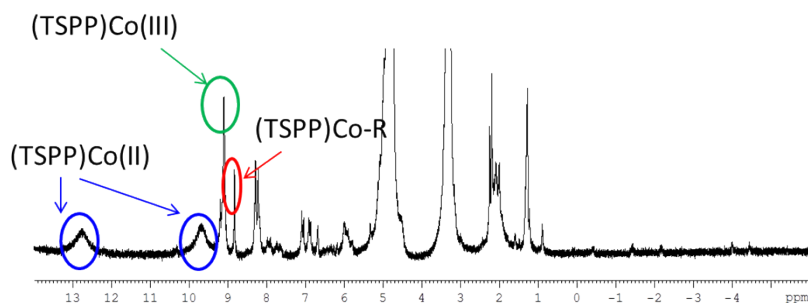

**Figure S1** Elimination of Cobalt alkyls in air. Both (TSPP)Co(III) and (TSPP)Co(II) was observed.

**ESI-MS results** Due to weak Co-C bond, both ESI-MS and MALDI-TOF-MS failed to give MS characterization of cobalt alkyl complexes. The spectra all showed *m/z* for (TSPP)Co shown in Fig. S2.

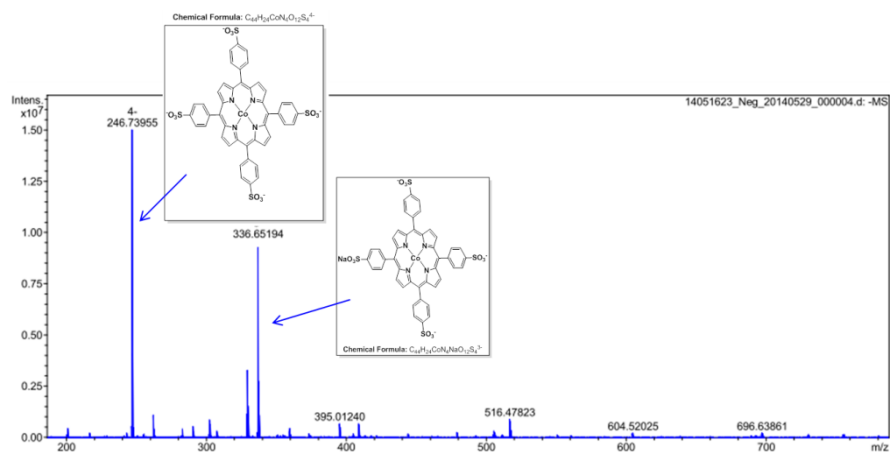

**Figure S2** ESI-MS results for cobalt alkyl species. All reported cobalt alkyls in the manuscript gave almost the same spectra. The two highest  $m/z$  peaks correspond to (TSPP)Co with loss of 4  $\text{Na}^+$  and 3  $\text{Na}^+$ .

## Reference

- [1] (a) K. R. Ashley, S. B. Shyu and J. G. Leipoldt, *Inorg. Chem.* **1980**, *19*, 1613. (b) K. R. Ashley, J. G. Leipoldt, *Inorg. Chem.* **1981**, *20*, 2326.
- [2] L. A. Drio, L. S. Quek, J. G. Taylor, K. H. Kuok, *Tetrahedron* **2009**, *65*, 1003.
- [3] N. Stefano, W. Jerome, *Org. Lett.* **2011**, *13*, 6324.
- [4] H. Yamamoto, E. Ho, K. Namba, H. Imagawa, M. Nishizawa, *Chem. –Eur. J.* **2010**, *16*, 11271.
- [5] G. Zhang, C. Li, Y. Wang, L. Zhang, *J. Am. Chem. Soc.* **2010**, *132*, 1474.
- [6] M. Foustieris, C. Chevrin, J. Le Bras, J. Muzart, *Green Chem.* **2006**, *8*, 522.
- [7] A. I. Roshchin, S. M. Kel'chevski, N. A. Bumagin, *J. Organomet. Chem.* **1998**, *560*, 163.
- [8] A. Alemagna, C. Baldoli, P. Del Buttero, E. Licandro, S. Maiorana, *J. Chem. Soc., Chem. Commun.* **1985**, 417.

Representative <sup>1</sup>H NMR spectra :

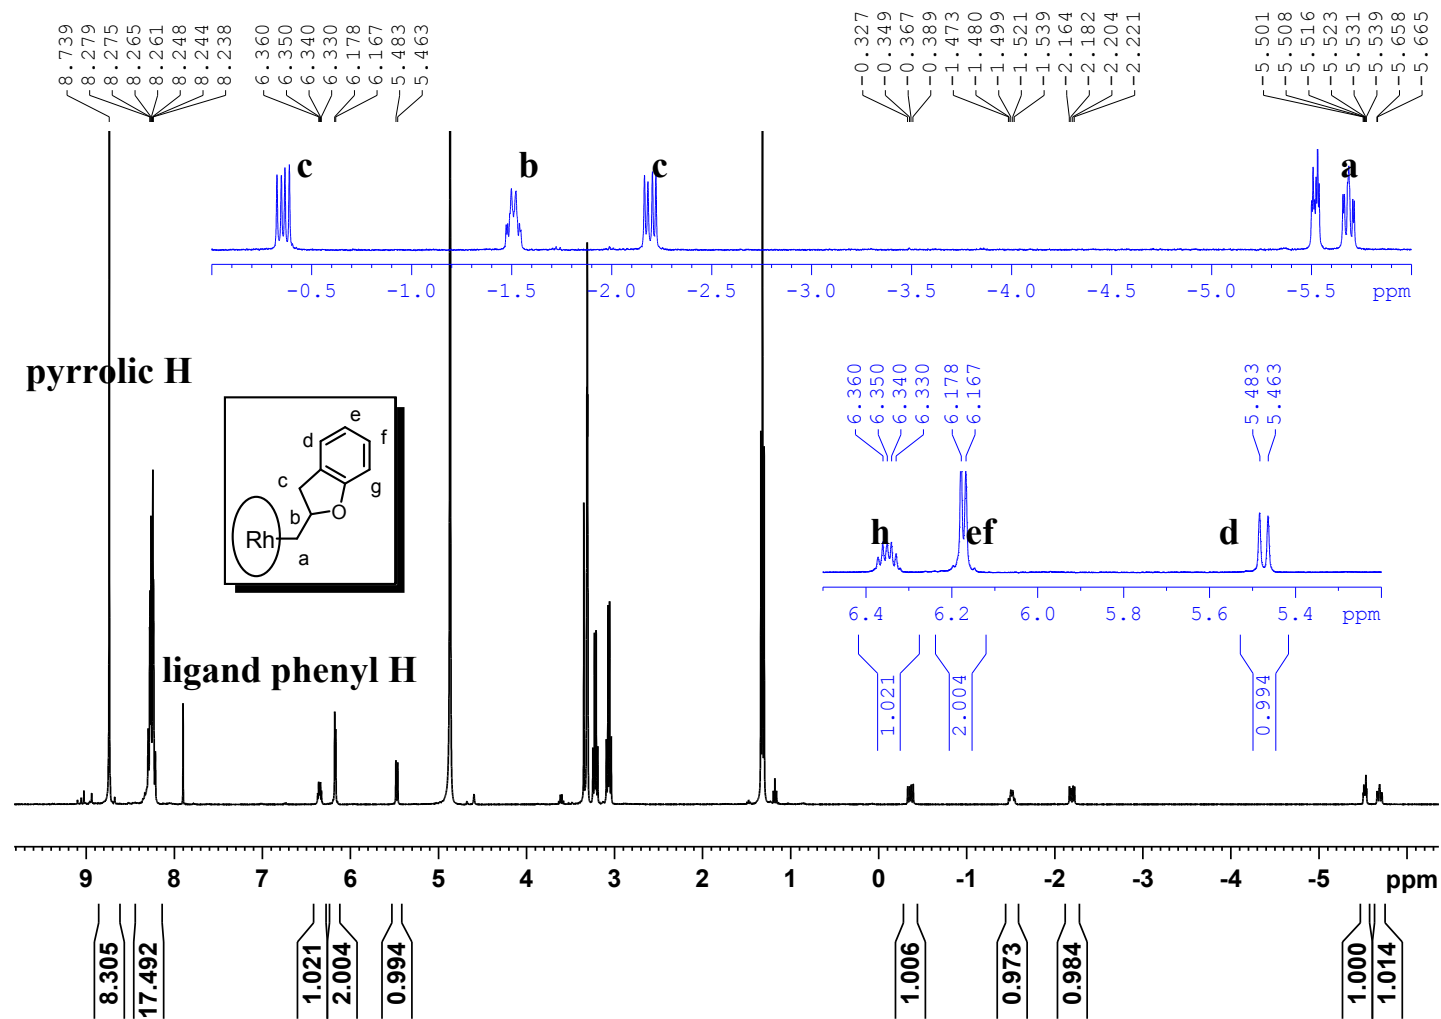

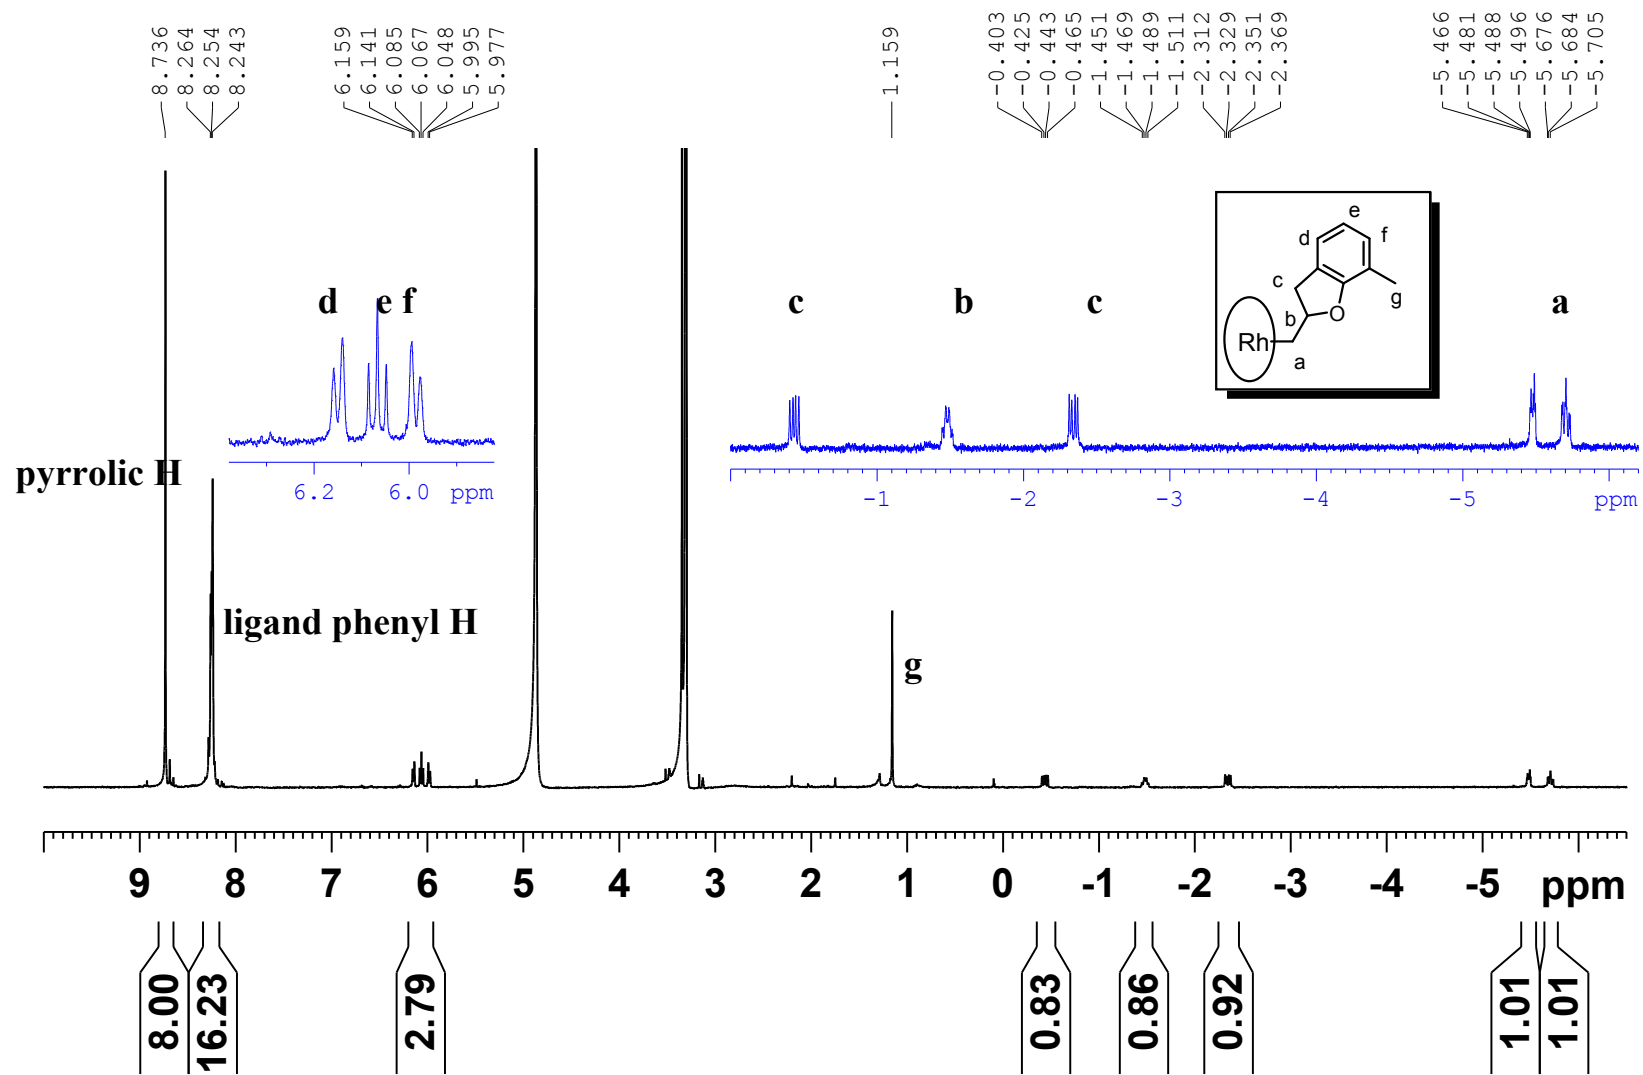

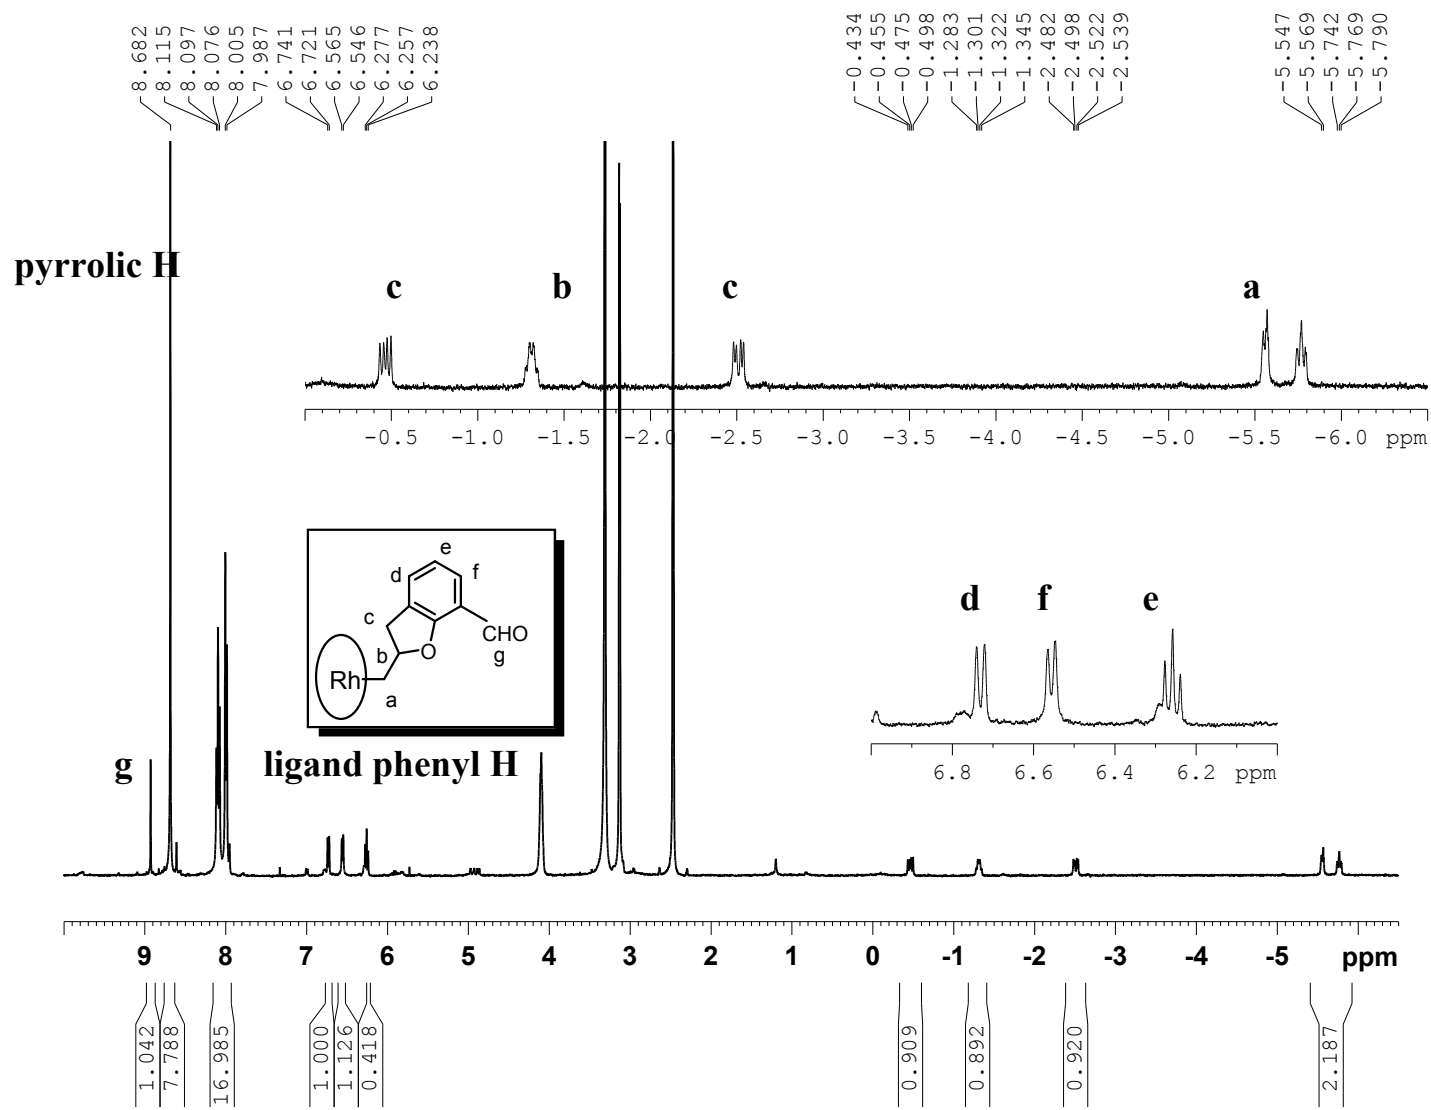

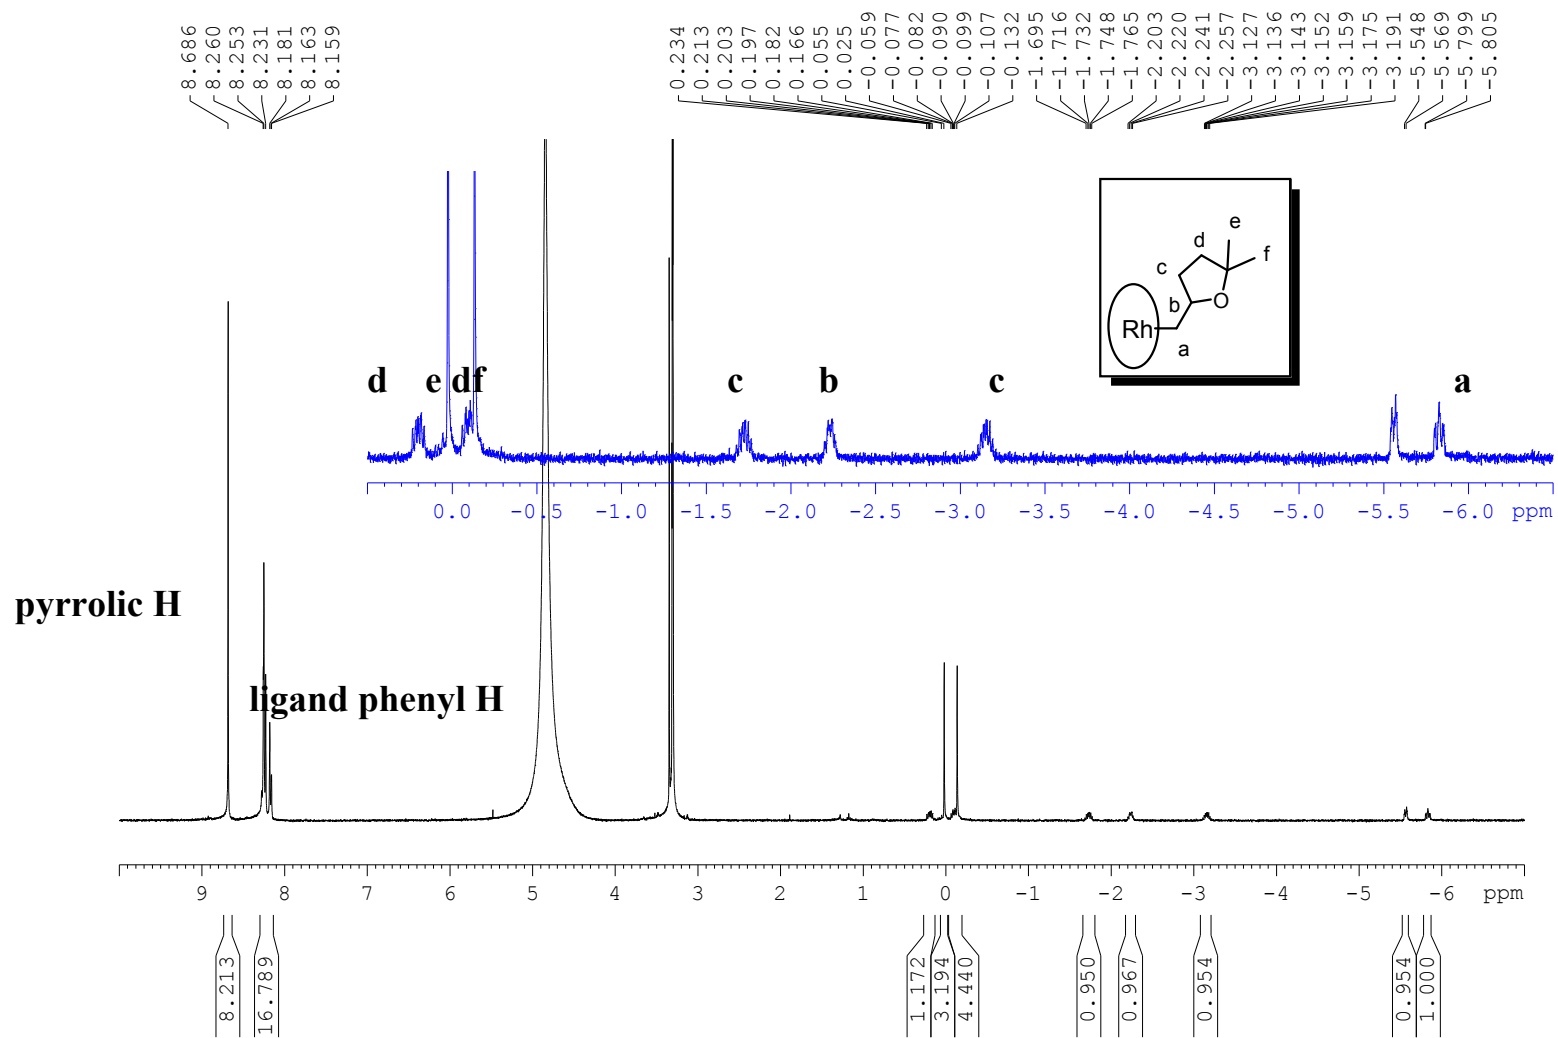

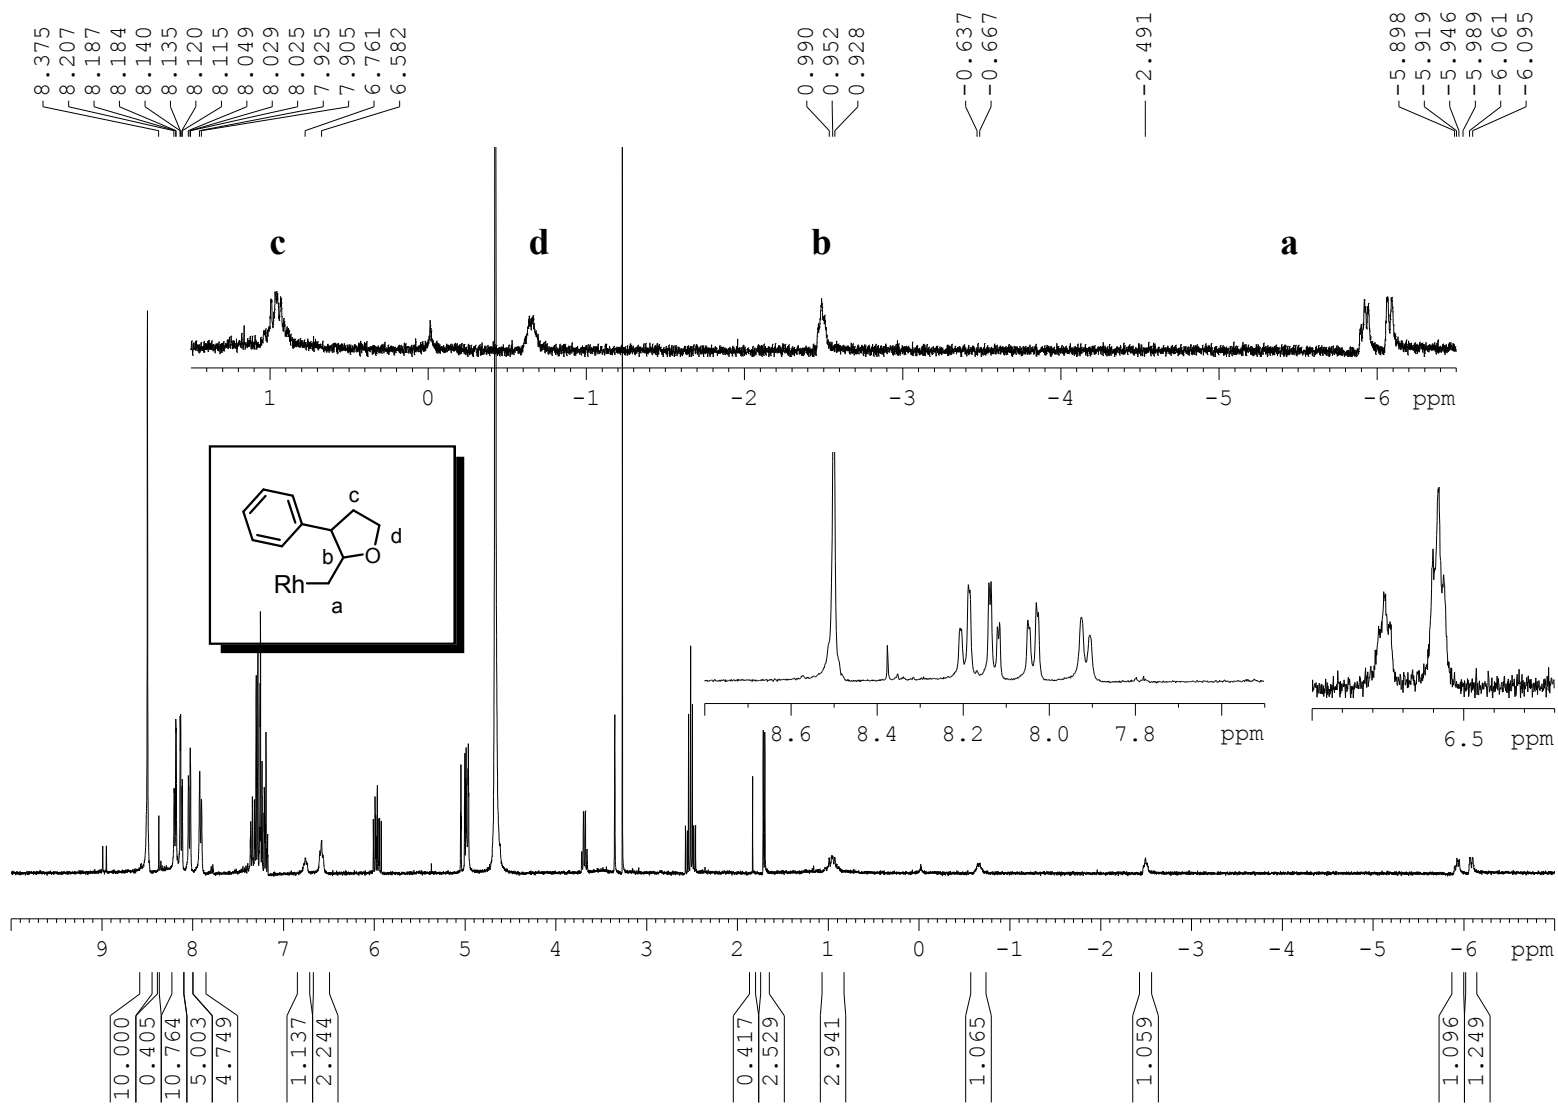



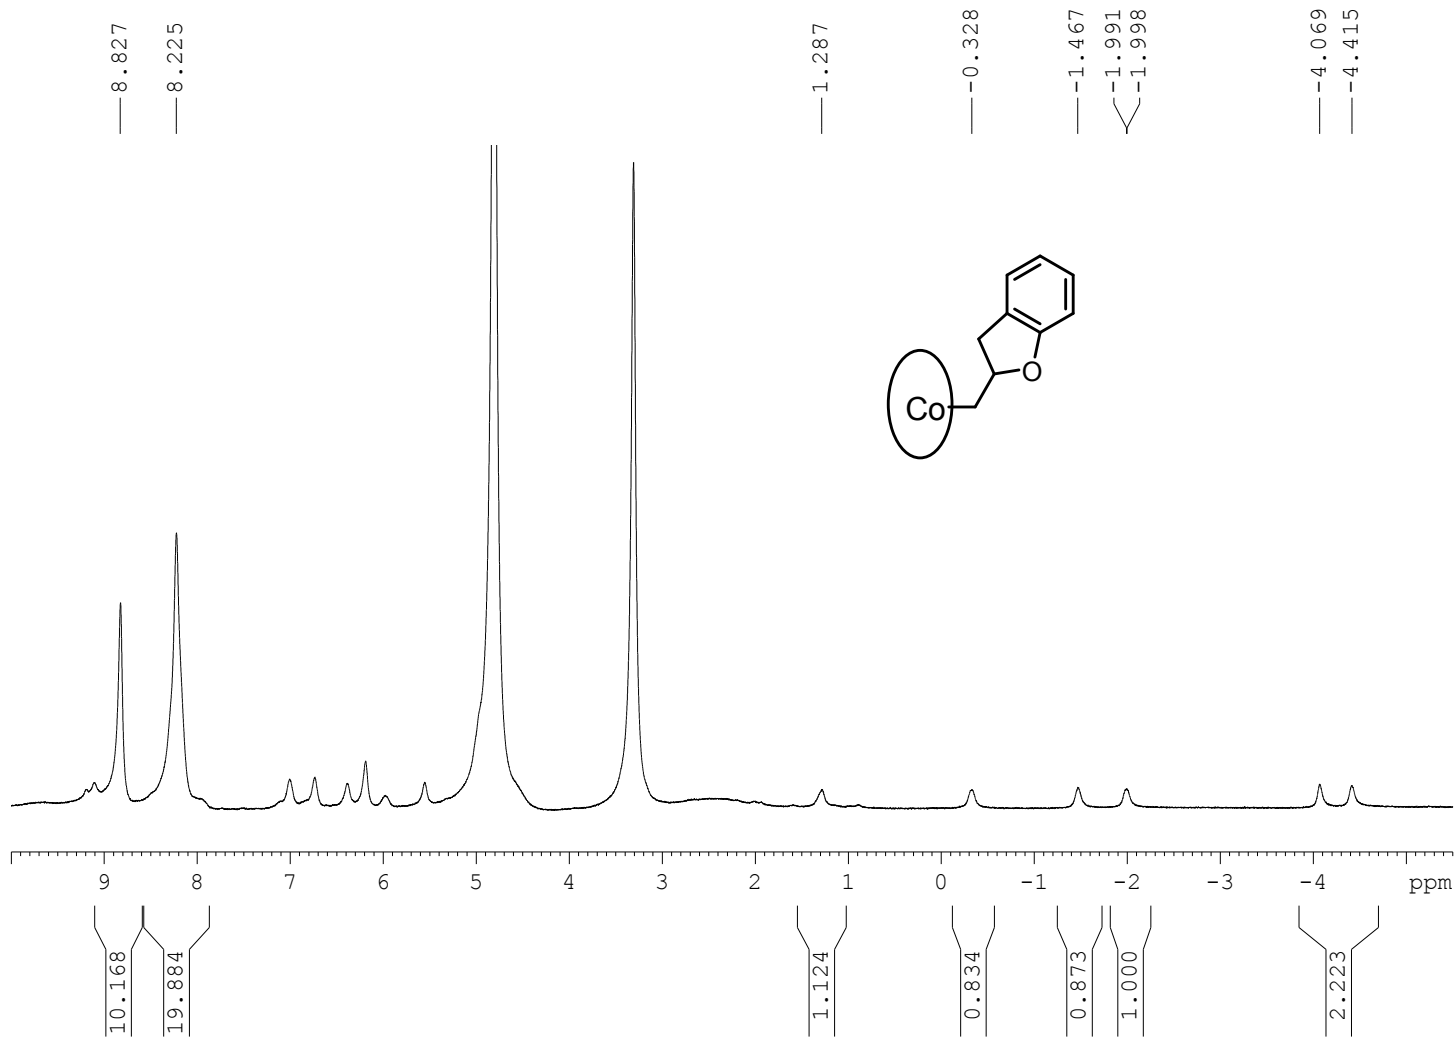

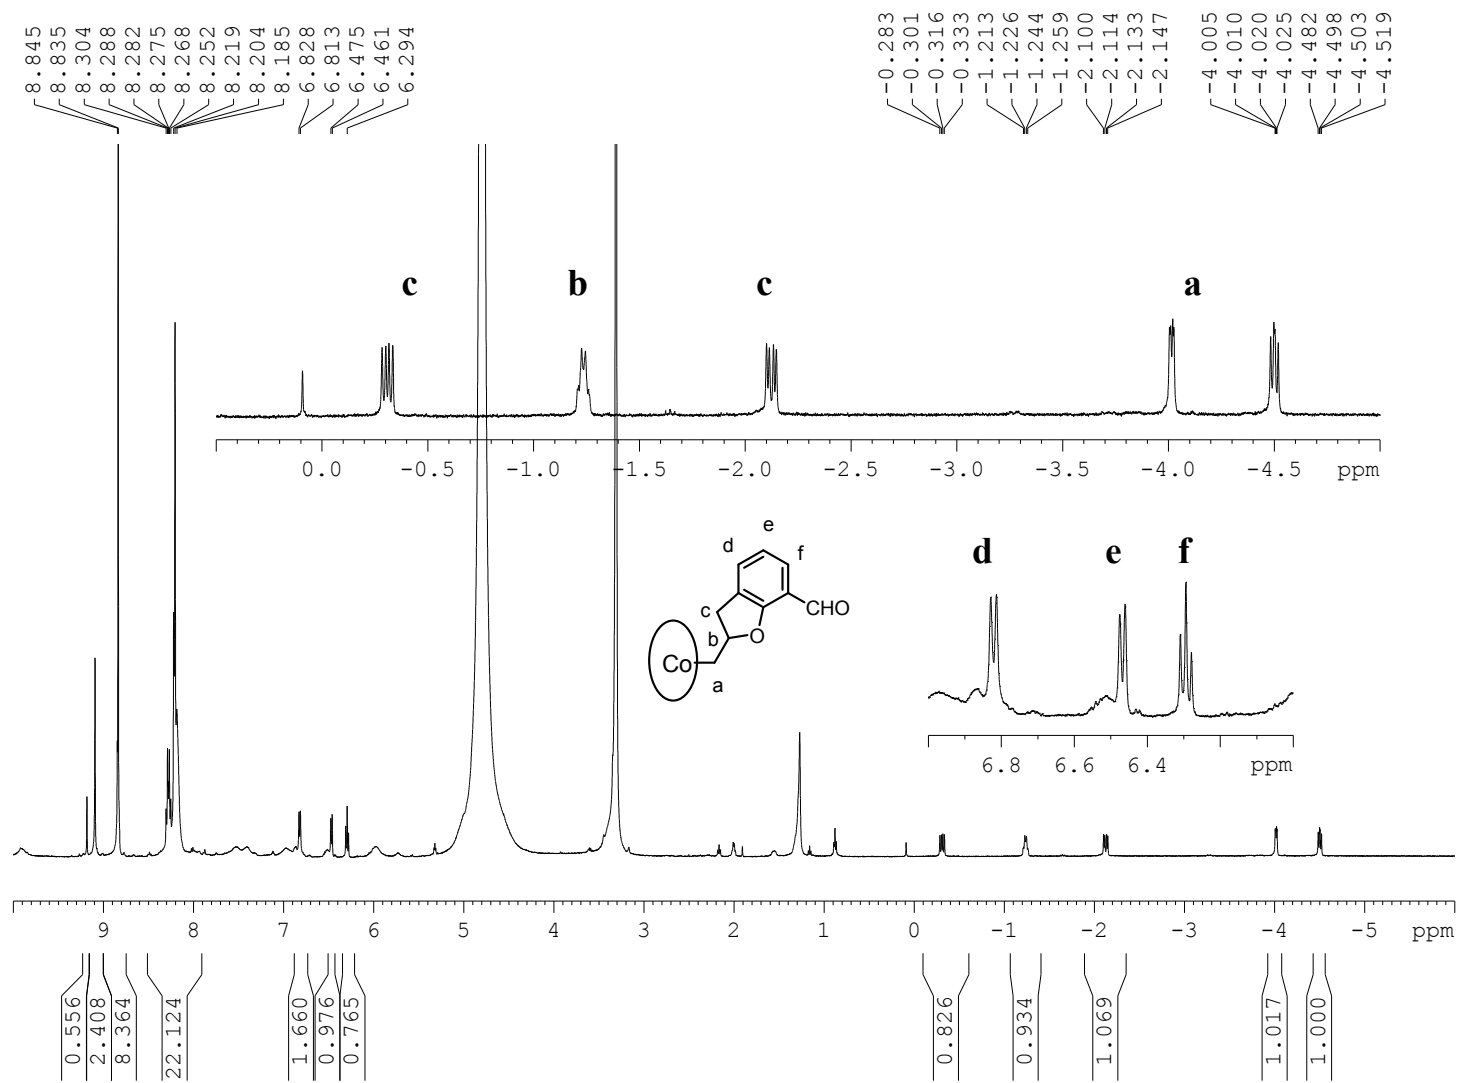

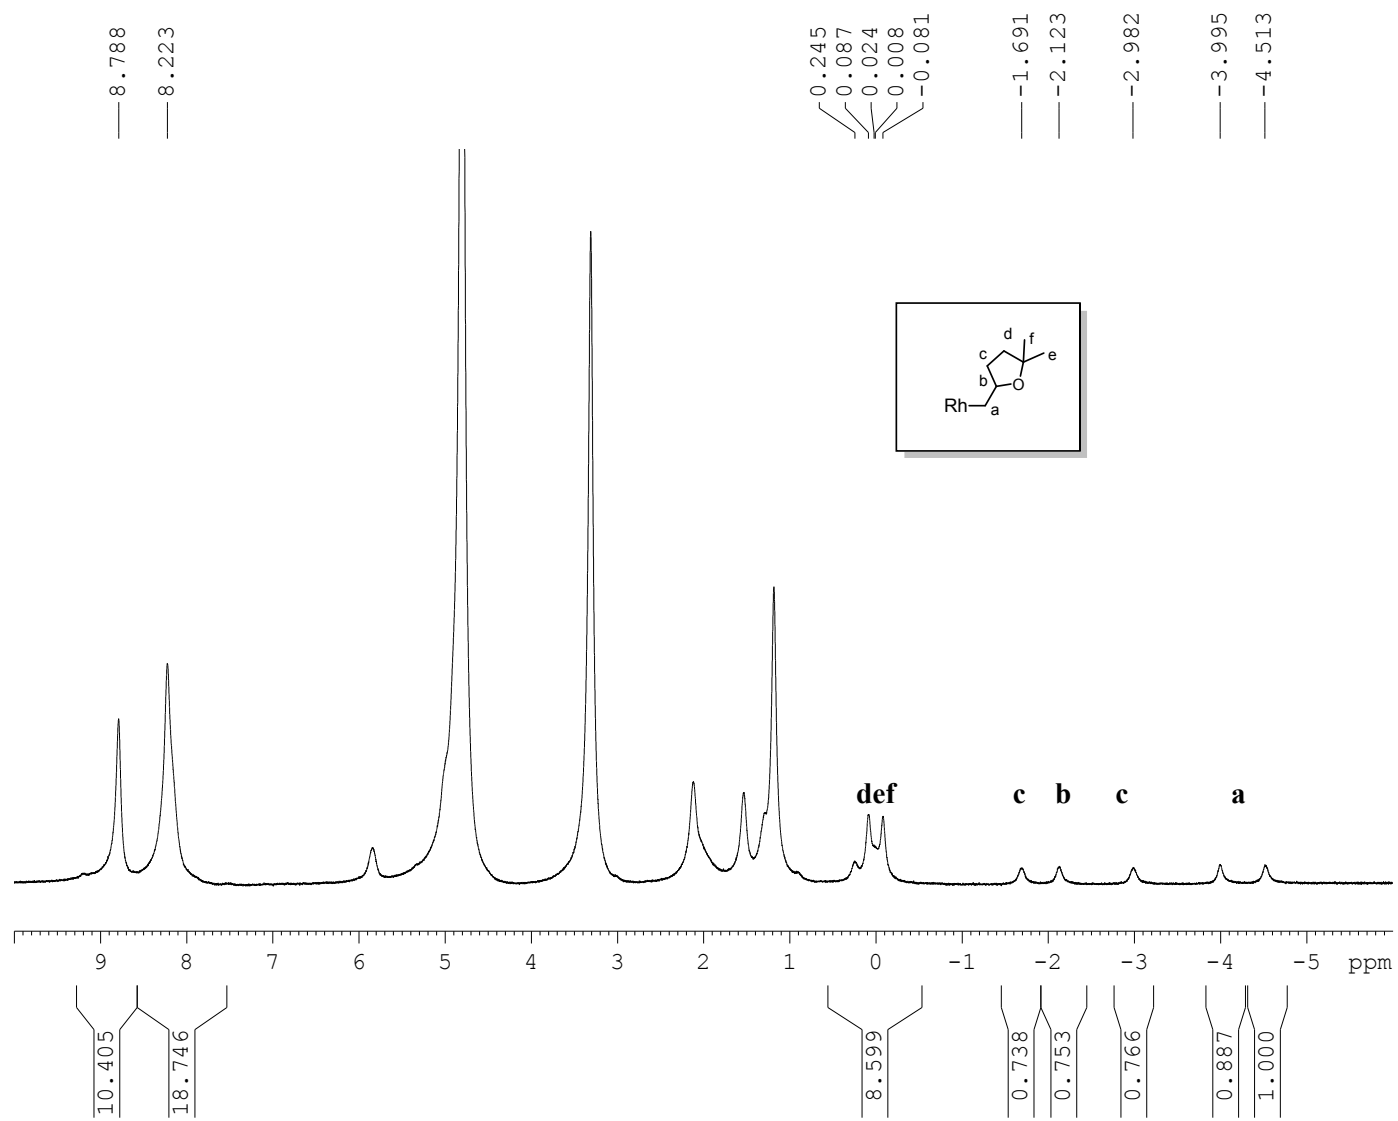

Supplement: c4qi00066h1.pdf [file c4qi00066h1.pdf]
